# Supplementary material
Source: publisher site journal article supplement (https://www.spandidos-publications.com/32/downloadSupplementary)

Figure S1. Sircol Collagen assay. (A) Effect of HG on collagen production in HG-treated AML12 cells. n=4/group. \*P<0.05 vs. control group; #P<0.05 vs. LG group. (B) Effect of miR-32 on collagen production in AML12 cells. n=4/group. \*P<0.05 vs. control group. (C) Effect of miR-32 on collagen production in HG-treated AML12 cells. n=4/group. \*P<0.05 vs. HG group. HG, high glucose (6,000 mg/l); miR, microRNA; NC, negative control; LG, low glucose (1,000 mg/l); AMO-32, antisense inhibitor of miR-32.

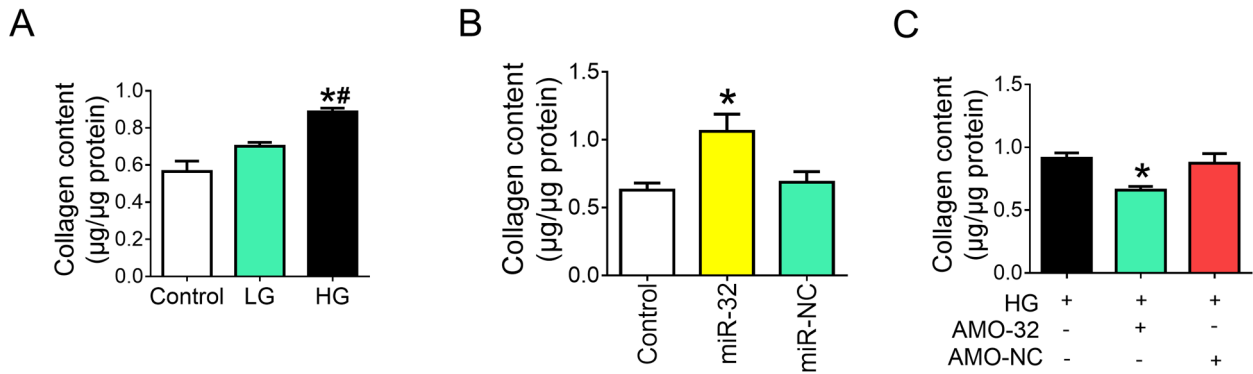

Figure S2. HG-treated AML12 cell viability was examined with Cell Counting Kit-8 (n=5/group). \*P<0.05 vs. HG group. OD, optical density; HG, high glucose (6,000 mg/l).

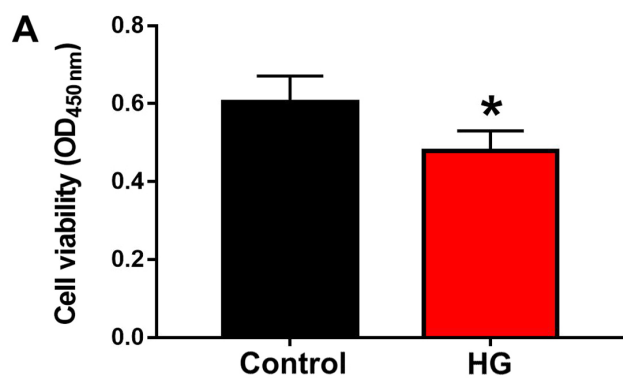

Figure S3. Effects of MTA3 on the expression of (A) epithelial marker E-cad, mesenchymal markers  $\alpha$ -SMA and vimentin by western blot and reverse transcription-quantitative polymerase chain reaction. (C) Transfection efficiency of MTA3-overexpressing plasmid was confirmed by western blotting. n=3-4/group. GAPDH was used as loading control. \*P<0.05 vs. control group; #P<0.05 vs. HG group. MTA3, metastasis-associated protein MTA3; E-cad, E-cadherin;  $\alpha$ -SMA,  $\alpha$ -smooth muscle actin; Col-1, collagen-1; HG, high glucose (6,000 mg/l).

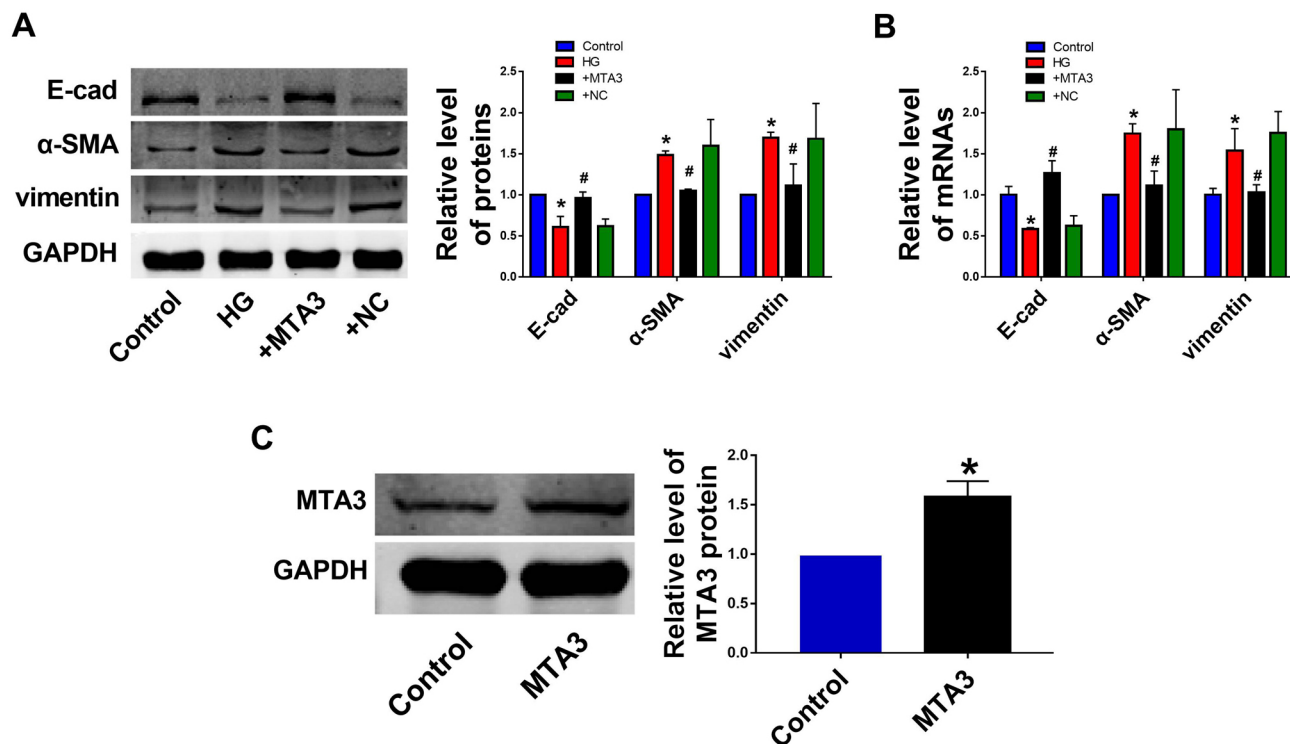

Supplement: Supplementary file 1 [file downloadSupplementary]
